# Supplementary material for: Advancing a Framework to Enable Characterization and Evaluation of Data Streams Useful for Biosurveillance
Source: PubMed Central journal article supplement (PMC3879288; doi:10.1371/journal.pone.0083730), 2014-01-02
Supplement: pone.0083730.s001.pdf [file pone.0083730.s001.pdf]

**Table S1. Biosurveillance data stream examples reported in the literature and binned according to the Data Stream Framework.**

| <b>Population</b>    | <b>Type</b>                | <b>Category</b>                                             | <b>Descriptors</b>                         | <b>Reference</b>                                                                                                |
|----------------------|----------------------------|-------------------------------------------------------------|--------------------------------------------|-----------------------------------------------------------------------------------------------------------------|
| Human                | Diagnostic                 | Laboratory Records                                          | Monitored malaria case loads               | <sup>[1]</sup> Mueller 2009                                                                                     |
| Animal, Plant, Human | Diagnostic                 | Laboratory Records<br>Official Reports                      | Optimal sentinel data                      | <sup>[2]</sup> Polgreen 2009                                                                                    |
| Human                | Environmental<br>Syndromic | Social Media                                                | Insights for Search - Google               | <sup>[3]</sup> Scheitle 2011                                                                                    |
| Human                | Syndromic                  | Ambulance / EMT Records                                     | Dispatches                                 | <sup>[4]</sup> Plagianos2011, <sup>[5]</sup> Buehler 2008, <sup>[6]</sup> Hope 2010                             |
| Human                | Diagnostic/Syndromic       | Clinic / Health Care Provider Records                       | Biosense-CDC                               | <sup>[7]</sup> Tokars 2010, <sup>[8]</sup> Bradley 2005                                                         |
| Human                | Diagnostic/Syndromic       | Clinic / Health Care Provider Records                       | Clinician based reporting                  | <sup>[9]</sup> Koski 2011                                                                                       |
| Human                | Diagnostic/Syndromic       | Clinic / Health Care Provider Records                       | Timeliness of records                      | <sup>[10]</sup> Huaman 2009                                                                                     |
| Human                | Diagnostic/Syndromic       | Clinic / Health Care Provider Records                       | Health Care professionals                  | <sup>[11]</sup> Ashford 2003                                                                                    |
| Animal               | Diagnostic/Syndromic       | Clinic / Health Care Provider Records                       | Veterinary                                 | <sup>[12]</sup> Thomas-Bachil 2012, <sup>[13]</sup> Bartlett 2010                                               |
| Human                | Syndromic                  | ED/ Hospital Records                                        | ED visits, chief complaints                | <sup>[6]</sup> Hope 2010                                                                                        |
| Human                | Syndromic                  | ED/ Hospital Records                                        | Hospitals, inpatient: chief complaint      | <sup>[7]</sup> Tokars 2010                                                                                      |
| Human                | Syndromic<br>Diagnostic    | ED/ Hospital Records                                        | Hospital, ED ICD-9 codes                   | <sup>[14]</sup> Shmueli 2010                                                                                    |
| Human                | Diagnostic                 | ED/ Hospital Records                                        | Emergency department diagnosis             | <sup>[4]</sup> Plagianos2011                                                                                    |
| Human                | Diagnostic                 | ED/ Hospital Records                                        | DoD Outpatient: final Diagnosis            | <sup>[7]</sup> Tokars 2010                                                                                      |
| Human                | Diagnostic                 | ED/ Hospital Records                                        | VA Outpatient: final Diagnosis             | <sup>[7]</sup> Tokars 2010                                                                                      |
| Human                | Diagnostic                 | ED/ Hospital Records                                        | Hospitals, inpatient: final diagnosis      | <sup>[7]</sup> Tokars 2010                                                                                      |
| Human                | Diagnostic/Syndromic       | ED/ Hospital Records                                        | Clinic or Emergency Department (ED) visits | <sup>[5]</sup> Buehler 2008                                                                                     |
| Human                | Syndromic                  | ED/ Hospital Records                                        | Syndromic hospital surveillance            | <sup>[7]</sup> Tokars 2010, <sup>[6]</sup> Hope 2010, <sup>[4]</sup> Plagianos 2011, <sup>[15]</sup> Malik 2011 |
| Animal, Plant, Human | Diagnostic/Syndromic       | ED/ Hospital Records<br>Clinic/Health Care Provider Records | Electronic health records<br>Veterinary    | <sup>[16]</sup> Rabadan 2009                                                                                    |
| Human                | Syndromic                  | Employment/School Records                                   | School absenteeism                         | <sup>[5]</sup> Buehler 2008<br><sup>[17]</sup> Balabanova 2011                                                  |
| Human                | Syndromic                  | Employment/School Records                                   | Work absenteeism<br>School nurse           | <sup>[5]</sup> Buehler 2008<br><sup>[17]</sup> Balablanova 2011, <sup>[8]</sup> Bradley 2005                    |
| Animal               | Environmental/Social       | Established database                                        | Wildlife Tracking                          | <sup>[18]</sup> Freifeld 2010                                                                                   |
| Animal               | Environmental/Social       | Established Database                                        | Remotes Sensing                            | <sup>[19]</sup> Clements 2009                                                                                   |

| Pathogen |                                     |                         | Geo location and remote sensing of viral zoonosis                                                                                                                                                                                         |
|----------|-------------------------------------|-------------------------|-------------------------------------------------------------------------------------------------------------------------------------------------------------------------------------------------------------------------------------------|
| Human    | Environmental/Social -Built-Natural | Established Database    | CIA Factbook <sup>[20]</sup> Keller 2009                                                                                                                                                                                                  |
| All      | Environmental/Natural               | Established Database    | Solar radiation, dew point, temperature <sup>[21]</sup> Charland 2009, <sup>[22]</sup> Degroote 2008                                                                                                                                      |
| All      | Environmental/Natural               | Established Database    | Climate monitoring (malaria) <sup>[23]</sup> Cox 2007                                                                                                                                                                                     |
| All      | Environmental/Natural               | Established Database    | Meteorological factors <sup>[24]</sup> Kristan 2008                                                                                                                                                                                       |
| All      | Environmental/Natural               | Established Database    | Seasonal climate forecasts <sup>[11]</sup> Mueller 2009                                                                                                                                                                                   |
| All      | Environmental/Natural               | Established Database    | Observed meteorological data <sup>[11]</sup> Mueller 2009                                                                                                                                                                                 |
| All      | Environmental/Social                | Established Database    | Demographics <sup>[25]</sup> Chui 2011                                                                                                                                                                                                    |
| All      | Environmental/Natural               | Established Database    | Geospatial analysis <sup>[26]</sup> Baker 2011                                                                                                                                                                                            |
| All      | Environmental/Natural               | Established Database    | Geographical position <sup>[21]</sup> Charland 2009                                                                                                                                                                                       |
| All      | Environmental/Natural               | Established Database    | Google Maps/Google Earth <sup>[27]</sup> Atkinson 2008                                                                                                                                                                                    |
| Human    | Syndromic                           | Help Lines              | Health/Medical hotline calls <sup>[8]</sup> Bradley 2005 <sup>[5]</sup> Buehler 2008                                                                                                                                                      |
| Human    | Syndromic                           | Help Lines              | Poison Control Center calls <sup>[5]</sup> Buehler 2008                                                                                                                                                                                   |
| Human    | Syndromic                           | Help Lines              | Emergency medical services (EMS)/911 calls <sup>[5]</sup> Buehler 2008                                                                                                                                                                    |
| Human    | Environmental/Built                 | Help Lines              | Water utility complaint lines, call center <sup>[28]</sup> Berger 2006                                                                                                                                                                    |
| Human    | Syndromic                           | Internet Search Queries | Google flu trends -internet searches <sup>[29]</sup> Ortiz 2011                                                                                                                                                                           |
| Human    | Syndromic                           | Internet Search Queries | Search engine queries (ILI) <sup>[30]</sup> Ginsberg 2009                                                                                                                                                                                 |
| Human    | Environmental Syndromic             | Internet Search Queries | Web-based search queries <sup>[31]</sup> Hulth 2011, <sup>[32]</sup> Brownstein 2008, <sup>[33]</sup> Brownstein 2009, <sup>[34]</sup> Chan 2011, <sup>[35]</sup> Hulth 2010, <sup>[36]</sup> Polgreen 2008, <sup>[37]</sup> Madoff 2011  |
| Human    | Syndromic                           | Internet Search Queries | Anonymous web query data - from country medical sites <sup>[31]</sup> Hulth 2011                                                                                                                                                          |
| Animal   | Diagnostic                          | Laboratory Reports      | Zoo - necropsies <sup>[38]</sup> McNamara2007                                                                                                                                                                                             |
| Animal   | Syndromic                           | Laboratory Reports      | Veterinary syndromic surveillance <sup>[39]</sup> Dorea 2011                                                                                                                                                                              |
|          |                                     |                         | -clinical data from practitioners                                                                                                                                                                                                         |
|          |                                     |                         | -diagnostic laboratory data                                                                                                                                                                                                               |
| Animal   | Diagnostic                          | Laboratory Reports      | Veterinary and Zoo reporting - Data elements required for lab submission for disease reporting that allow for voluntary collaboration and data sharing by avoiding issues associated with privacy legislation <sup>[40]</sup> Kloeze 2011 |

|                         |                               |                                  |                                                                                                                                            |                                                                                                                              |
|-------------------------|-------------------------------|----------------------------------|--------------------------------------------------------------------------------------------------------------------------------------------|------------------------------------------------------------------------------------------------------------------------------|
| Human, Animal           | Diagnostic                    | Laboratory Reports               | Food sample testing                                                                                                                        | <sup>[41]</sup> Dubrawski 2009                                                                                               |
| Human, Animal, Pathogen | Diagnostic                    | Laboratory Reports               | Biotracing biological contamination in feed/food chain                                                                                     | <sup>[42]</sup> Hoorfar 2011, <sup>[43]</sup> Knutsson 2011                                                                  |
| Pathogen                | Diagnostic                    | Laboratory Reports               | Molecular diagnostic reporting<br>Molecular techniques for pathogen identification<br>Genotyping                                           | <sup>[44]</sup> Olano 2011<br><sup>[16]</sup> Rabadan 2009<br><sup>[45]</sup> Sintchenko 2009,<br><sup>[26]</sup> Baker 2011 |
| Human                   | Diagnostic                    | Laboratory Reports               | Breath Analyzer for real-time VOC (Volatile organic compounds)<br>Mobile                                                                   | <sup>[46]</sup> Churchill 2009                                                                                               |
| Human                   | Diagnostic                    | Laboratory Reports               | GPS enabled inhaler +<br>iphone<br>Mobile                                                                                                  | <sup>[18]</sup> Freifeld 2010                                                                                                |
| Human                   | Diagnostic                    | Laboratory Reports               | Mobile phone - geocoded photographs of blood samples for rapid detection of malaria strains<br>Mobile 1                                    | <sup>[47]</sup> Fuller 2010                                                                                                  |
| Animal, Plant, Human    | Diagnostic                    | Laboratory Reports               | Sentinel health facilities<br>-electronic transfer of data by mobile phones<br>-manual transfer of data                                    | <sup>[1]</sup> Mueller 2009                                                                                                  |
| Human                   | Syndromic                     | News Aggregators                 | Online health news alerts                                                                                                                  | <sup>[48]</sup> Collier 2010                                                                                                 |
| Human                   | Syndromic                     | News Aggregators                 | Internet news feeds<br>unstructured and structured data sets                                                                               | <sup>[49]</sup> Grady 2008                                                                                                   |
| Human                   | Environmental Syndromic       | News Aggregators                 | Online news monitoring                                                                                                                     | <sup>[27]</sup> Atkinson 2008,<br><sup>[33]</sup> Brownstein 2009                                                            |
| Human                   | Environmental Syndromic       | News Aggregators                 | Google news                                                                                                                                | <sup>[50]</sup> Keller 2009,<br><sup>[32]</sup> Brownstein 2008                                                              |
| Human                   | Environmental Syndromic       | News Aggregators                 | RSS feeds                                                                                                                                  | <sup>[50]</sup> Keller 2009                                                                                                  |
| Human                   | Environmental Syndromic       | News Aggregators                 | Web news sites plus natural language processing to transform free text into structured info stored in a relational data base with GIS tags | EpiSpider <sup>[50]</sup> Keller 2009                                                                                        |
| Human                   | Environmental Syndromic       | News Aggregators                 | Online news articles                                                                                                                       | <sup>[51]</sup> Torii 2011                                                                                                   |
| All                     | Environmental/Social -Natural | News Aggregators                 | Violent and natural disaster event extraction from online news                                                                             | <sup>[52]</sup> Piskorski 2011                                                                                               |
| Human                   | Environmental/Social -Natural | News Aggregators                 | Real time news event extraction with limited linguistic sophistication for violent and disaster events                                     | <sup>[53]</sup> Tanev 2008                                                                                                   |
| Human                   | Environmental/Social          | News Aggregators<br>Social Media | Internet indicators and warnings of social disruption                                                                                      | <sup>[54]</sup> Wilson 2009                                                                                                  |
| Human                   | Environmental Syndromic       | News Aggregators<br>Social Media | Unverified news information                                                                                                                | <sup>[55]</sup> Mykhalovskiy 2007                                                                                            |

|                    |                                       |                                                                   |                                                                                                             |                                                                             |
|--------------------|---------------------------------------|-------------------------------------------------------------------|-------------------------------------------------------------------------------------------------------------|-----------------------------------------------------------------------------|
| Human              | Environmental Syndromic               | News Aggregators<br>Social Media                                  | Mainstream news<br>Text mining (ontology based)                                                             | <sup>[56]</sup> Drague 2010                                                 |
| Animal             | Environmental/Social                  | Official Reports                                                  | Mainstream news<br>Zoo- report pest control measures on grounds<br>Zoo- survey of local wildlife on grounds | <sup>[38]</sup> McNamara2007                                                |
| Animal             | Syndromic                             | Official Reports                                                  | Monitoring of sentinel bird flocks - detect and report dead bird clusters in real time                      | <sup>[19]</sup> Clements 2009                                               |
| Animal             | Syndromic<br>Diagnostic               | Official Reports                                                  | Zoos - sentinel animal data                                                                                 | <sup>[57]</sup> Pultorak 2011,<br><sup>[58]</sup> Adler 2011                |
| Human              | Environmental/Social                  | Official Reports                                                  | UN Human Development Report                                                                                 | <sup>[50]</sup> Keller 2009                                                 |
| Human              | Environmental/Built                   | Official Reports                                                  | Drinking water turbidity levels<br>Environmental case report                                                | <sup>[28]</sup> Berger 2006                                                 |
| Human              | Environmental/Built                   | Official Reports                                                  | Public utilities data                                                                                       | <sup>[59]</sup> Baer 2011                                                   |
| Pathogen           | Environmental/Natural                 | Official Reports                                                  | Geographic distribution of viruses<br>Remote sensing                                                        | <sup>[60]</sup> Trifonov 2009                                               |
| All                | Environmental/Natural<br>-Built       | Official Reports                                                  | Air quality<br>Established monitoring system                                                                | <sup>[61]</sup> Babin 2008                                                  |
| All                | Environmental/Natural<br>-Built       | Official Reports                                                  | Water quality<br>Established monitoring system                                                              | <sup>[28]</sup> Berger 2006,<br>Burkom 2011                                 |
| Pathogen           | Environmental/Social                  | Official Reports<br>Academic                                      | Disease vector populations                                                                                  | <sup>[58]</sup> Adler 2010                                                  |
| Pathogen<br>Animal | Environmental/Social                  | Official Reports<br>Academic                                      | Vector densities                                                                                            | <sup>[24]</sup> Kristan 2008                                                |
| Pathogen           | Environmental/Natural                 | Official Reports<br>Academic                                      | Pyhlogeography(spatial analysis of genetic variation of pathogens)                                          | <sup>[19]</sup> Clements 2009                                               |
| Human              | All                                   | Official Reports<br>Laboratory Records                            | Multinational surveillance reports (surveillance systems)<br>Established surveillance system                | <sup>[50]</sup> Keller 2009                                                 |
| Animal             | Environmental/Social                  | Official Reports<br>Academic                                      | Geographic patterns of livestock/animal population distributions<br>Animal/herd movement                    | <sup>[62]</sup> Ortiz-Pelaez 2010 <sup>[63]</sup> Vernon 2009               |
| Human              | Diagnostic                            | Official Reports                                                  | Validated official alerts (WHO, CDC)                                                                        | <sup>[20]</sup> <sup>[50]</sup> Keller 2009,<br><sup>[64]</sup> Briand 2011 |
| Animal             | Diagnostic<br>Syndromic<br>Diagnostic | Official Reports<br>Personal<br>Communication<br>Official Reports | Mortality reports<br>Livestock monitoring - web-based data set to share results with privacy controls       | <sup>[40]</sup> Kloeze 2011                                                 |
| Human              | Syndromic<br>Envrionmental/Social     | Prediction Markets                                                | Prediction markets                                                                                          | <sup>[65]</sup> Polgreen                                                    |
| Human              | Syndromic                             | Prediction Markets                                                | Prediction markets (experts, health care)                                                                   | <sup>[66]</sup> Pfeiffer 2010,<br><sup>[65]</sup> Polgreen 2007             |

|       |                            |                                  |                                                                                                                                                                                 |                                                                                                                                                      |
|-------|----------------------------|----------------------------------|---------------------------------------------------------------------------------------------------------------------------------------------------------------------------------|------------------------------------------------------------------------------------------------------------------------------------------------------|
| Human | Syndromic                  | Sales                            | providers)<br>Over-the-Counter (OTC)<br>medicine purchases                                                                                                                      | <sup>[28]</sup> Berger 2006<br><sup>[5]</sup> Buehler 2008,<br><sup>[6]</sup> Hope 2010                                                              |
| Human | Syndromic                  | Sales                            | Prescription Medical Sales                                                                                                                                                      | <sup>[5]</sup> Buehler 2008                                                                                                                          |
| Human | Syndromic                  | Sales                            | Grocery purchase trends                                                                                                                                                         |                                                                                                                                                      |
| Human | Syndromic                  | Sales                            | Retail data                                                                                                                                                                     | <sup>[67]</sup> Bracken 2006                                                                                                                         |
| Human | Environmental<br>Syndromic | Social Media<br>News Aggregators | Expert curated accounts<br>Mainstream news                                                                                                                                      | <sup>[50]</sup> Keller 2009                                                                                                                          |
| Human | Environmental<br>Syndromic | Social Media                     | SMS (Short Message<br>Service)                                                                                                                                                  | <sup>[18]</sup> Freifeld 2010,<br><sup>[68]</sup> Gomez 2008,<br><sup>[69]</sup> Gow 2010                                                            |
| Human | Environmental<br>Syndromic | Social Media                     | SMS texting                                                                                                                                                                     | <sup>[70][71]</sup> Lewis 2011,<br><sup>[68]</sup> Gomez<br>2009,2010                                                                                |
| Human | Environmental<br>Syndromic | Social Media                     | SMS messaging,<br>microblogging, emailing,<br>social networking, internet<br>chatting, blogging, online<br>news reporting,<br>video/radio reporting,<br>health expert reporting | <sup>[50]</sup> Keller 2009,<br><sup>[72]</sup> Khan 2010<br><sup>[54]</sup> Wilson 2009<br><sup>[73]</sup> Boulos 2011<br><sup>[74]</sup> Lyon 2011 |
| Human | Environmental<br>Syndromic | Social Media                     | Twitter                                                                                                                                                                         | <sup>[75]</sup> Sigorini 2011                                                                                                                        |

## Table S1 References

1. Mueller DH, Abeku TA, Okia M, Rapuoda B, Cox J (2009) Costs of early detection systems for epidemic malaria in highland areas of Kenya and Uganda. *Malaria Journal* 8. Available: [://WOS:000264573500003](http://WOS:000264573500003); <http://www.malariajournal.com/content/pdf/1475-2875-8-17.pdf>.
2. Polgreen PM, Chen ZQ, Segre AM, Harris ML, Pentella MA, et al. (2009) Optimizing Influenza Sentinel Surveillance at the State Level. *Am J Epidemiol* 170: 1300–1306. doi:10.1093/aje/kwp270.
3. Scheitle CP (2011) Google's Insights for Search: A Note Evaluating the Use of Search Engine Data in Social Research. *Soc Sci Q* 92: 285–295. doi:10.1111/j.1540-6237.2011.00768.x.
4. Plagianos MG, Wu WY, McCullough C, Paladini M, Lurio J, et al. (2011) Syndromic surveillance during pandemic (H1N1) 2009 outbreak, New York, New York, USA. *Emerg Infect Dis* 17: 1724–1726. doi:10.3201/eid1709.101357.
5. Buehler JW, Sonricker A, Paladini M, Soper P, Mostashari F (2008) Syndromic surveillance practice in the United States: findings from a survey of state, territorial, and selected local health departments. *Advances in Disease Surveillance* 6: 1–20.
6. Hope KG, Merritt TD, Durrheim DN, Massey PD, Kohlhagen JK, et al. (2010) Evaluating the utility of emergency department syndromic surveillance for a regional public health service. *Commun Dis Intell* 34: 310–318.
7. Tokars JI, English R, McMurray P, Rhodes B (2010) Summary of data reported to CDC's national automated biosurveillance system, 2008. *BMC Med Inform Decis Mak* 10. Available: [://WOS:000279921700001](http://WOS:000279921700001).
8. Bradley CA, Rolka H, Walker D, Loonsk J (2005) BioSense: implementation of a National Early Event Detection and Situational Awareness System. *MMWR Morb Mortal Wkly Rep* 54 Suppl: 11–19.
9. Koski E (2011) Clinical Laboratory Data for Biosurveillance; Infectious Disease Informatics and Biosurveillance. In: Castillo-Chavez CC, editor. *Integrated Series in Information Systems*. Springer US, Vol. 27. pp. 67–87. Available: [http://dx.doi.org/10.1007/978-1-4419-6892-0\\_4](http://dx.doi.org/10.1007/978-1-4419-6892-0_4).
10. Huaman MA, Araujo-Castillo RV, Soto G, Neyra JM, Quispe JA, et al. (2009) Impact of two interventions on timeliness and data quality of an electronic disease surveillance system in a resource limited setting (Peru): a prospective evaluation. *BMC Med Inform Decis Mak* 9: 16. doi:10.1186/1472-6947-9-16.

11. Ashford DA, Kaiser RM, Bales ME, Shutt K, Patrawalla A, et al. (2003) Planning against biological terrorism: Lessons from outbreak investigations. *Emerging Infectious Diseases* 9: 515–519.
12. Thomas-Bachli A, Pearl D, Friendship R, Berke O (2012) Suitability and limitations of portion-specific abattoir data as part of an early warning system for emerging diseases of swine in Ontario. *Bmc Veterinary Research* 8: 3.
13. Bartlett PC, Van Buren JW, Neterer M, Zhou C (2010) Disease surveillance and referral bias in the veterinary medical database. *Prev Vet Med* 94: 264–271. doi:10.1016/j.prevetmed.2010.01.007.
14. Shmueli G, Burkom H (2010) Statistical Challenges Facing Early Outbreak Detection in Biosurveillance. *Technometrics* 52: 39–51. doi:10.1198/tech.2010.06134.
15. Malik MT, Gumel A, Thompson LH, Strome T, Mahmud SM (2011) “Google flu trends” and emergency department triage data predicted the 2009 pandemic H1N1 waves in Manitoba. *Can J Public Health* 102: 294–297.
16. Rabadan R, Calman N, Hripcsak G (2009) Next Generation Syndromic Surveillance: Molecular Epidemiology, Electronic Health Records and the Pandemic Influenza A (H1N1) Virus. *PLoS Curr* 1. doi:10.1371/currents.RRN1012.
17. Balabanova Y, Gilsdorf A, Buda S, Burger R, Eckmanns T, et al. (2011) Communicable Diseases Prioritized for Surveillance and Epidemiological Research: Results of a Standardized Prioritization Procedure in Germany, 2011. *PLoS One* 6. Available: [://WOS:000295963300017](#).
18. Freifeld CC, Chunara R, Mekaru SR, Chan EH, Kass-Hout T, et al. (2010) Participatory Epidemiology: Use of Mobile Phones for Community-Based Health Reporting. *Plos Med* 7. Available: [://WOS:000285499600003](#).
19. Clements AC, Pfeiffer DU (2009) Emerging viral zoonoses: frameworks for spatial and spatiotemporal risk assessment and resource planning. *Vet J* 182: 21–30. doi:10.1016/j.tvjl.2008.05.010.
20. Keller M, Freifeld CC, Brownstein JS (2009) Automated vocabulary discovery for geoparsing online epidemic intelligence. *BMC Bioinformatics* 10. Available: [://WOS:000272335800001](#).
21. Charland KML, Buckeridge DL, Sturtevant JL, Melton F, Reis BY, et al. (2009) Effect of environmental factors on the spatio-temporal patterns of influenza spread. *Epidemiol Infect* 137: 1377–1387. doi:10.1017/s0950268809002283.
22. DeGroot JP, Sugumaran R, Brend SM, Tucker BJ, Bartholomay LC (2008) Landscape, demographic, entomological, and climatic associations with human disease incidence of West Nile virus in the state of Iowa, USA. *International Journal of Health Geographics* 7. Available: [://WOS:000258233300001](#).

23. Cox J, Abeku TA (2007) Early warning systems for malaria in Africa: from blueprint to practice. *Trends in Parasitology* 23: 243–246. doi:10.1016/j.pt.2007.03.008.
24. Kristan M, Abeku TA, Beard J, Okia M, Rapuoda B, et al. (2008) Variations in entomological indices in relation to weather patterns and malaria incidence in East African highlands: implications for epidemic prevention and control. *Malaria Journal* 7. Available: [://WOS:000261438800001](http://www.malariajournal.com/content/pdf/1475-2875-7-231.pdf);  
<http://www.malariajournal.com/content/pdf/1475-2875-7-231.pdf>.
25. Chui KKH, Wenger JB, Cohen SA, Naumova EN (2011) Visual Analytics for Epidemiologists: Understanding the Interactions Between Age, Time, and Disease with Multi-Panel Graphs. *PLoS One* 6. Available: [://WOS:000287369200002](http://www.ncbi.nlm.nih.gov/pmc/articles/PMC3124441/).
26. Baker S, Holt KE, Clements ACA, Karkey A, Arjyal A, et al. (2011) Combined high-resolution genotyping and geospatial analysis reveals modes of endemic urban typhoid fever transmission. *Open Biology* 1: 110008–110008. doi:10.1098/rsob.110008.
27. Atkinson M, Piskorski J, Pouliquen B, Steinberger R, Tanev H, et al. (2008) Online-monitoring of security-related events Association for Computational Linguistics. pp. 145–148.
28. Berger M, Shiao R, Weintraub JM (2006) Review of syndromic surveillance: implications for waterborne disease detection. *J Epidemiol Community Health* 60: 543–550. doi:10.1136/jech.2005.038539.
29. Ortiz JR, Zhou H, Shay DK, Neuzil KM, Fowlkes AL, et al. (2011) Monitoring Influenza Activity in the United States: A Comparison of Traditional Surveillance Systems with Google Flu Trends. *PloS One* 6: e18687. doi:10.1371/journal.pone.0018687.
30. Ginsberg J, Mohebbi MH, Patel RS, Brammer L, Smolinski MS, et al. (2009) Detecting influenza epidemics using search engine query data. *Nature* 457: 1012–1014. doi:10.1038/nature07634.
31. Hulth A, Rydevik G (2011) GET WELL: an automated surveillance system for gaining new epidemiological knowledge. *Bmc Public Health* 11. Available: [://WOS:000290848500001](http://www.ncbi.nlm.nih.gov/pmc/articles/PMC3124441/).
32. Brownstein JS, Freifeld CC (2008) Evaluation of Internet-Based Informal Surveillance for Global Infectious Disease Intelligence. *International Journal of Infectious Diseases* 12: E193–E194. doi:10.1016/j.ijid.2008.05.481.
33. Brownstein JS, Freifeld CC, Madoff LC (2009) Digital disease detection--harnessing the Web for public health surveillance. *N Engl J Med* 360: 2153–2155, 2157. doi:10.1056/NEJMp0900702.
34. Chan T-C, King C-C (2011) Surveillance and Epidemiology of Infectious Diseases using Spatial and Temporal Clustering Methods; *Infectious Disease Informatics and*



Biosurveillance. In: Castillo-Chavez CC, editor. *Integrated Series in Information Systems*. Springer US, Vol. 27. pp. 207–234. Available: [http://dx.doi.org/10.1007/978-1-4419-6892-0\\_10](http://dx.doi.org/10.1007/978-1-4419-6892-0_10).

35. Hulth A, Andersson Y, Hedlund KO, Andersson M (2010) Eye-Opening Approach to Norovirus Surveillance. *Emerging Infectious Diseases* 16: 1319–1321. doi:10.3201/eid1608.100093.
36. Polgreen PM, Chen YL, Pennock DM, Nelson FD (2008) Using Internet Searches for Influenza Surveillance. *Clin Infect Dis* 47: 1443–1448. doi:10.1086/593098.
37. Madoff LC, Fisman DN, Kass-Hout T (2011) A New Approach to Monitoring Dengue Activity. *Plos Neglected Tropical Diseases* 5. Available: <://WOS:000291099100049>.
38. McNamara T (2007) The role of zoos in biosurveillance. *International Zoo Yearbook* 41: 12–15. doi:10.1111/j.1748-1090.2007.00019.x.
39. Dorea FC, Sanchez J, Revie CW (2011) Veterinary syndromic surveillance: Current initiatives and potential for development. *Prev Vet Med* 101: 1–17. doi:10.1016/j.prevetmed.2011.05.004.
40. Kloeze H, Berezowski J, Bergeron L, de With N, Duizer G, et al. (2011) A Minimum Data Set of Animal Health Laboratory Data to allow for Collation and Analysis across Jurisdictions for the Purpose of Surveillance. *Transboundary and Emerging Diseases*: no-no. doi:10.1111/j.1865-1682.2011.01264.x.
41. Dubrawski A, Sabhnani M, Knight M, Baysek M, Neill D, et al. (2009) T-Cube Web Interface in support of real-time bio-surveillance program IEEE. pp. 495–495.
42. Hoorfar J, Wagner M, Jordan K, Bouquin SL, Skiby J (2011) Towards biotracing in food chains. *International Journal of Food Microbiology* 145, Supplement 1: S1–S4. doi:10.1016/j.ijfoodmicro.2010.04.028.
43. Knutsson R, van Rotterdam B, Fach P, De Medici D, Fricker M, et al. (2011) Accidental and deliberate microbiological contamination in the feed and food chains - How biotraceability may improve the response to bioterrorism. *Int J Food Microbiol* 145: S123–S128. doi:10.1016/j.ijfoodmicro.2010.10.011.
44. Olano JP, Walker DH (2011) Diagnosing Emerging and Reemerging Infectious Diseases The Pivotal Role of the Pathologist. *Arch Pathol Lab Med* 135: 83–91.
45. Sintchenko V, Gallego B (2009) Laboratory-Guided Detection of Disease Outbreaks Three Generations of Surveillance Systems. *Arch Pathol Lab Med* 133: 916–925. doi:10.1043/1543-2165-133.6.916.
46. Churchill R, Lorence D, Richards M (2010) Proposed Model for ONCHIT Pre-Case Biosurveillance Using Multiple Array Sensing and Non-Invasive Data Capture. *J Med Syst* 34: 695–700. doi:10.1007/s10916-009-9283-8.

47. Fuller S (2010) Tracking the Global Express: new tools addressing disease threats across the world. *Epidemiology* 21: 769–771. doi:10.1097/EDE.0b013e3181f56757.
48. Collier N (2010) What's unusual in online disease outbreak news? *J Biomed Semantics* 1: 2. doi:10.1186/2041-1480-1-2.
49. Grady N, Vizenor L, Marin J, Peitersen L (2008) Bio-surveillance Event Models, Open Source Intelligence, and the Semantic Web. *Biosurveillance and Biosecurity*: 22–31. doi:10.1007/978-3-540-89746-0\_3.
50. Keller M, Blench M, Tolentino H, Freifeld CC, Mandl KD, et al. (2009) Use of Unstructured Event-Based Reports for Global Infectious Disease Surveillance. *Emerg Infect Dis* 15: 689–695. doi:10.3201/eid1505.081114.
51. Torii M, Yin LL, Nguyen T, Mazumdar CT, Liu HF, et al. (2011) An exploratory study of a text classification framework for Internet-based surveillance of emerging epidemics. *Int J Med Inform* 80: 56–66. doi:10.1016/j.ijmedinf.2010.10.015.
52. Piskorski J, Tanev H, Atkinson M, van der Goot E, Zavarella V (2011) Online News Event Extraction for Global Crisis Surveillance; Transactions on Computational Collective Intelligence V. In: Nguyen N, editor. *Lecture Notes in Computer Science*. Springer Berlin / Heidelberg, Vol. 6910. pp. 182–212. Available: [http://dx.doi.org/10.1007/978-3-642-24016-4\\_10](http://dx.doi.org/10.1007/978-3-642-24016-4_10).
53. Tanev H, Piskorski J, Atkinson M (2008) Real-Time News Event Extraction for Global Crisis Monitoring; Natural Language and Information Systems. In: Kapetanios ES, editor. *Lecture Notes in Computer Science*. Springer Berlin / Heidelberg, Vol. 5039. pp. 207–218. Available: [http://dx.doi.org/10.1007/978-3-540-69858-6\\_21](http://dx.doi.org/10.1007/978-3-540-69858-6_21).
54. Wilson K, Brownstein JS (2009) Early detection of disease outbreaks using the Internet. *Cmaj* 180: 829–831. doi:10.1503/cmaj.090215.
55. Mykhalovskiy E, Weir L (2006) The global public health intelligence network and early warning outbreak detection - A Canadian contribution to global public health. *Can J Public Health-Rev Can Sante Publ* 97: 42–44.
56. Dragu N, Elkhoury F, Miyazaki T, Morelli RA, di Tada N (2010) Ontology-Based Text Mining for Predicting Disease Outbreaks.
57. Pultorak E, Nadler Y, Travis D, Glaser A, McNamara T, et al. (2011) Zoological institution participation in a West Nile Virus surveillance system: implications for public health. *Public Health* 125: 592–599. doi:10.1016/j.puhe.2011.03.013.
58. Adler PH, Tuten HC, Nelder MP (2011) Arthropods of Medicoveterinary Importance in Zoos. *Annual Review of Entomology*, Vol 56 56: 123–142. doi:10.1146/annurev-ento-120709-144741.

59. Baer A, Duchin J (2009) Monitoring Staphylococcus Infection Trends with Biosurveillance Data. Available: <http://isdsjournal.org/articles/3205.pdf>.
60. Trifonov V, Khiabanian H, Rabadan R (2009) Geographic Dependence, Surveillance, and Origins of the 2009 Influenza A (H1N1) Virus. *New England Journal of Medicine* 361: 115–119. doi:10.1056/NEJMp0904572.
61. Babin SM, Burkom HS, Holtry RS, Taberner NR, Davies-Cole JO (2008) Air Quality Effects on Health-Indicator Data in Disease Outbreak Surveillance. *Johns Hopkins Apl Technical Digest* 27: 393–402.
62. Ortiz-Pelaez A, Pfeiffer DU, Tempia S, Otieno FT, Aden HH, et al. (2010) Risk mapping of Rinderpest sero-prevalence in Central and Southern Somalia based on spatial and network risk factors. *BMC Vet Res* 6. Available: [://WOS:000278259600001](http://WOS:000278259600001).
63. Vernon MC, Keeling MJ (2009) Representing the UK's cattle herd as static and dynamic networks. *Proc R Soc B-Biol Sci* 276: 469–476. doi:10.1098/rspb.2008.1009.
64. Briand S, Mounts A, Chamberland M (2011) Challenges of global surveillance during an influenza pandemic. *Public Health* 125: 247–256. doi:10.1016/j.puhe.2010.12.007.
65. Polgreen PM, Nelson FD, Neumann GR, Weinstein RA (2007) Use of Prediction Markets to Forecast Infectious Disease Activity. *Clinical Infectious Diseases* 44: 272–279. doi:10.1086/510427.
66. Pfeiffer T, Almenberg J (2010) Prediction markets and their potential role in biomedical research--a review. *Biosystems* 102: 71–76. doi:10.1016/j.biosystems.2010.09.005.
67. Bracken T (2006) Early Warning: The Role of Retail Data Biosurveillance in our Country's Preparedness Efforts. Available: <http://www.BioSentinel.net>.
68. Gomez A (2008) Connecting communities of need with public health: can SMS text-messaging improve outreach communication? 2008 41st Annual Hawaii International Conference on System Sciences: 1043–10521052.
69. Gow GA, Waidyanatha N, Mary VP (2010) Using Mobile Phones in a Real-time Biosurveillance Program: Lessons from the frontlines in Sri Lanka and India. In: Michael K, editor. *Proceedings of the 2010 Ieee International Symposium on Technology and Society: Social Implications of Emerging Technologies*. IEEE International Symposium on Technology and Society. New York: Ieee. pp. 366–374. Available: [://WOS:000287498800040](http://WOS:000287498800040).
70. Lewis SH, Chretien JP (2008) The Potential Utility of Electronic Disease Surveillance Systems in Resource-Poor Settings. *Johns Hopkins Apl Technical Digest* 27. Available: [www.jhuapl.edu/techdigest/TD/td2704/happellewis.pdf](http://www.jhuapl.edu/techdigest/TD/td2704/happellewis.pdf).

71. Lewis SH, Holtry RS, Loschen WA, Wojcik R, Hung L, et al. (2011) The Collaborative Experience of Creating the National Capital Region Disease Surveillance Network. *J Public Health Manag Pract* 17: 248–254. doi:10.1097/PHH.0b013e3181f9eeda.
72. Khan AS, Fleischauer A, Casani J, Groseclose SL (2010) The Next Public Health Revolution: Public Health Information Fusion and Social Networks. *Am J Public Health* 100: 1237–1242. doi:10.2105/ajph.2009.180489.
73. Boulos KMN, Resch B, Crowley DN, Breslin JG, Sohn G, et al. (2011) Crowdsourcing, citizen sensing and sensor web technologies for public and environmental health surveillance and crisis management: trends, OGC standards and application examples. *Int J Health Geogr* 10: 67. doi:10.1186/1476-072x-10-67.
74. Lyon A, Nunn M, Gossel G, Burgman M (2011) Comparison of Web-Based Biosecurity Intelligence Systems: BioCaster, EpiSPIDER and HealthMap. *Transboundary and Emerging Diseases*: no–no. doi:10.1111/j.1865-1682.2011.01258.x.
75. Gulli A, Signorini A (2005) The indexable web is more than 11.5 billion pages 1062789: *ACM*. pp. 902–903. doi:10.1145/1062745.1062789.
